# Supplementary material for: Resource Availability as Driving Factor of the Reproductive Mode in Soil Microarthropods (Acari, Oribatida)
Source: PubMed Central journal article supplement (PMC4123916; doi:10.1371/journal.pone.0104243), 2014-08-06
Supplement: pone.0104243.s001.pdf [file pone.0104243.s001.pdf]

**Supplementary Material Table S1.** Sex ratio and numbers of eggs of oribatid mite species.

| Species                   | female                                                     | male | sex unknown | total | total sexed | %female <sup>o</sup> | eggs <sup>+</sup> | egg/female <sup>#</sup> | egg/population <sup>§</sup> |      |
|---------------------------|------------------------------------------------------------|------|-------------|-------|-------------|----------------------|-------------------|-------------------------|-----------------------------|------|
| <b>Enarthronota</b>       |                                                            |      |             |       |             |                      |                   |                         |                             |      |
| Brachychthoniidae         | <i>Brachychthonius berlesei</i> Willmann, 1936             | 54   | 0           | 298   | 352         | 54                   | 100               | 49                      | 1,00                        | 0,91 |
|                           | Brachychthoniidae Thor, 1934                               | 7    | 0           | 140   | 147         | 7                    | 100               | 5                       | 1,00                        | 0,71 |
|                           | <i>Liochthonius</i> sp. v. d. Hammen, 1959                 | 1    | 0           | 13    | 14          | 1                    | 100               | 1                       | 1,00                        | 1,00 |
|                           | <i>Sellnickochthonius honestus</i> (Moritz, 1976)          | 8    | 0           | 85    | 93          | 8                    | 100               | 8                       | 1,00                        | 1,00 |
| Eniochthoniidae           | <i>Eniochthonius minutissimus</i> (Berlese, 1903)          | 382  | 0           | 600   | 982         | 382                  | 100               | 210                     | 1,00                        | 0,55 |
| Hypochthoniidae           | <i>Hypochthonius rufulus</i> C.L. Koch, 1835 <sup>§</sup>  | 4    | 0           | 5     | 9           | 4                    | 100               | 1                       | 1,00                        | 0,25 |
| <b>Mixonomata</b>         |                                                            |      |             |       |             |                      |                   |                         |                             |      |
| Euphthiracaridea          | <i>Rhysotritia duplicata</i> (Grandjean, 1953)             | 367  | 0           | 10    | 377         | 367                  | 100               | 420                     | 1,71                        | 1,14 |
| Phthiracaridae            | Phthiracaridae Perty, 1841                                 | 244  | 0           | 291   | 535         | 244                  | 100               | 429                     | 1,81                        | 1,76 |
|                           | <i>Steganacarus magnus</i> (Nicolet, 1955) <sup>§</sup>    | 2    |             | 1     | 3           | 2                    | 100               | 5                       | 5,00                        | 2,50 |
| <b>Desmonomata</b>        |                                                            |      |             |       |             |                      |                   |                         |                             |      |
| Malaconothridae           | <i>Malaconothrus gracilis</i> v.d. Hammen, 1952            | 242  | 0           | 31    | 273         | 242                  | 100               | 50                      | 1,02                        | 0,21 |
| Nanhermanniidae           | <i>Nanhermannia coronata</i> Berlese, 1913                 | 41   | 0           | 0     | 41          | 41                   | 100               | 30                      | 1,36                        | 0,73 |
|                           | <i>Nanhermannia nana</i> (Nicolet, 1855)                   | 548  | 0           | 0     | 548         | 548                  | 100               | 390                     | 1,30                        | 0,71 |
| Nothridae                 | <i>Nothrus silvestris</i> Nicolet, 1855                    | 737  | 0           | 0     | 737         | 737                  | 100               | 1169                    | 2,08                        | 1,59 |
| <b>Circumdehiscentiae</b> |                                                            |      |             |       |             |                      |                   |                         |                             |      |
| Achipteriidae             | <i>Achipteria coleoprata</i> (Linnaeus, 1758)              | 171  | 127         | 3     | 313         | 310                  | 55,16             | 311                     | 2,27                        | 1,82 |
| Astegistidae              | <i>Cultroribula bicultrata</i> (Berlese, 1905)             | 38   | 4           | 0     | 42          | 42                   | 90,48             | 11                      | 2,20                        | 0,29 |
| Carabodidae               | <i>Carabodes areolatus</i> Berlese, 1916 <sup>§</sup>      | 0    | 2           | 2     | 4           | 2                    | 0,00              | 0                       |                             |      |
|                           | <i>Carabodes femoralis</i> (Nicolet, 1855)                 | 4    | 5           | 6     | 14          | 8                    | 50,00             | 7                       | 3,50                        | 1,75 |
|                           | <i>Carabodes ornatus</i> Storkan, 1925                     | 2    | 5           | 4     | 11          | 7                    | 28,57             | 1                       | 1,00                        | 0,50 |
| Galumnidae                | <i>Galumna lanceata</i> Oudemans, 1900                     | 10   | 10          | 4     | 24          | 20                   | 50,00             | 7                       | 2,33                        | 0,70 |
| Oppiidae                  | <i>Berniniella sigma</i> (Strenzke, 1951)                  | 49   | 57          | 0     | 105         | 105                  | 46,67             | 2                       | 1,00                        | 0,04 |
|                           | <i>Dissorhina ornata</i> (Oudemans, 1900)                  | 88   | 75          | 0     | 169         | 169                  | 52,07             | 98                      | 1,61                        | 1,11 |
|                           | <i>Mediooppia subpectinata</i> (Oudemans, 1900)            | 13   | 10          | 0     | 23          | 23                   | 56,52             | 16                      | 2,00                        | 1,23 |
|                           | <i>Micropopia minus</i> (Paoli, 1908)                      | 3209 | 0           | 22    | 3231        | 3209                 | 100               | 22                      | 1,00                        | 0,01 |
|                           | <i>Oppiella nova</i> (Oudemans, 1902)                      | 1812 | 35          | 6     | 1855        | 1849                 | 98,00             | 414                     | 1,19                        | 0,23 |
| Oribatellidae             | <i>Ophidiotrichus tectus</i> (Michael, 1884)               | 11   | 11          | 0     | 22          | 22                   | 50,00             | 8                       | 2,67                        | 0,73 |
|                           | <i>Oribatella quadricornuta</i> Michael, 1880 <sup>§</sup> | 1    | 1           | 0     | 3           | 3                    | 33,33             | 4                       | 4,00                        | 4,00 |
| Oribatulidae              | <i>Oribatula tibialis</i> (Nicolet, 1855)                  | 244  | 93          | 16    | 353         | 337                  | 72,40             | 434                     | 3,50                        | 1,78 |
| Phenopelopidae            | <i>Eupelops plicatus</i> (C.L. Koch, 1836) <sup>§</sup>    | 3    | 0           | 1     | 4           | 3                    | 100               | 0                       |                             | 0,00 |
| Punctoribatidae           | <i>Minunthozetes semirufus</i> (Koch, 1841)                | 53   | 39          | 3     | 95          | 92                   | 57,61             | 23                      | 2,09                        | 0,43 |
| Suctobelbidae             | Suctobelbidae Jacot, 1938                                  | 3    | 0           | 180   | 183         | 3                    | 100               | 3                       | 1,00                        | 1,00 |
|                           | <i>Suctobelbella subcornigera</i> (Forsslund, 1941)        | 17   | 0           | 595   | 612         | 17                   | 100               | 17                      | 1,00                        | 1,00 |
|                           | <i>Suctobelbella subtrigona</i> (Oudemans, 1900)           | 7    | 0           | 156   | 163         | 7                    | 100               | 7                       | 1,00                        | 1,00 |
| Tectocephidae             | <i>Tectocephus minor</i> (Berlese, 1903)                   | 289  | 2           | 0     | 291         | 291                  | 99,31             | 115                     | 1,15                        | 0,40 |
|                           | <i>Tectocephus sarekensis</i> Trägårdh, 1910               | 451  | 0           | 0     | 451         | 451                  | 100               | 52                      | 1,24                        | 0,12 |
|                           | <i>Tectocephus velatus</i> (Michael, 1880)                 | 1146 | 0           | 1     | 1147        | 1146                 | 100               | 103                     | 1,11                        | 0,09 |
| Thyrisomidae              | <i>Banksinoma lanceata</i> (Michael, 1888)                 | 86   | 76          | 27    | 189         | 162                  | 53,09             | 45                      | 1,50                        | 0,52 |

<sup>§</sup> species are excluded from all statistical analyses

<sup>#</sup> only females with eggs

<sup>o</sup> from sex-determinable specimens

<sup>§</sup> total number of females including those without eggs

<sup>+</sup> total number
